# A Peek into the Plasmidome of Global Sewage

**Philipp Kirstahler<sup>1</sup>, Frederik Teudt<sup>1</sup>, Saria Otani<sup>1</sup>, Frank M. Aarestrup<sup>1</sup>, and Sünje Johanna Pamp<sup>1\*</sup>**

<sup>1</sup> Research Group for Genomic Epidemiology, Technical University of Denmark, Kgs. Lyngby, Denmark

1 \*Correspondence: [sjpa@dtu.dk](mailto:sjpa@dtu.dk)

2 Technical University of Denmark, 2800 Kongens Lyngby, Denmark.

3

4 **Keywords**

5 Plasmids, microbiome, wastewater, human, animals, Oxford Nanopore Sequencing

## 6 ***Abstract***

7 Plasmids can provide a selective advantage for microorganisms to survive and adapt to new  
8 environmental conditions. Plasmid-encoded traits, such as antimicrobial resistance (AMR) or  
9 virulence, impact on the ecology and evolution of bacteria and can significantly influence the burden  
10 of infectious diseases. Insight about the identity and functions encoded on plasmids on the global  
11 scale are largely lacking. Here we investigate the plasmidome of 24 samples (22 countries, 5  
12 continents) from the global sewage surveillance project. We obtained 105 Gbp Oxford Nanopore and  
13 167 Gbp Illumina DNA sequences from plasmid DNA preparations and assembled 165,302 contigs  
14 (159,322 circular). Of these, 58,429 encoded for genes with plasmid-related and 11,222 with  
15 virus/phage-related proteins. About 90% of the circular DNA elements did not have any similarity to  
16 known plasmids. Those that exhibited similarity, had similarity to plasmids whose hosts were  
17 previously detected in these sewage samples (e.g. *Acinetobacter*, *Escherichia*, *Moraxella*,  
18 *Enterobacter*, *Bacteroides*, and *Klebsiella*). Some AMR classes were detected at a higher abundance  
19 in plasmidomes (e.g. macrolide-lincosamide-streptogramin B, macrolide, and quinolone), as  
20 compared to the respective complex sewage samples. In addition to AMR genes, a range of functions  
21 were encoded on the candidate plasmids, including plasmid replication and maintenance,  
22 mobilization, and conjugation. In summary, we describe a laboratory and bioinformatics workflow  
23 for the recovery of plasmids and other potential extrachromosomal DNA elements from complex  
24 microbiomes. Moreover, the obtained data could provide further valuable insight into the ecology and  
25 evolution of microbiomes, knowledge about AMR transmission, and the discovery of novel  
26 functions.

27

## 28 ***Importance***

29 This is, to the best of our knowledge, the first study to investigate plasmidomes at a global scale  
30 using long read sequencing from complex untreated domestic sewage. Previous metagenomic  
31 surveys have detected AMR genes in a variety of environments, including sewage. However, it is  
32 unknown whether the AMR genes were encoded on the microbial chromosome or are located on  
33 extrachromosomal elements, such as plasmids. Using our approach, we recovered a large number of  
34 plasmids, of which most appear novel. We identified distinct AMR genes that were preferentially  
35 located on plasmids, potentially contributing to their transmissibility. Overall, plasmids are of great  
36 importance for the biology of microorganisms in their natural environments (free-living and host-  
37 associated), as well as molecular biology, and biotechnology. Plasmidome collections may therefore  
38 be valuable resources for the discovery of fundamental biological mechanisms and novel functions  
39 useful in a variety of contexts.

## 40 ***Introduction***

41 The term plasmid was introduced by Joshua Lederberg in 1952 to describe any extrachromosomal  
42 genetic particle (1). It was not until the 1970s when interest in plasmid research rapidly increased and  
43 plasmids were introduced as cloning vectors into an area that was dominated by phages as the vector  
44 for the transfer of pieces of DNA of choice (2). Since then, plasmids have been highly valuable tools  
45 in molecular microbiology. In their natural environment, plasmids are considered key players in  
46 horizontal gene transfer. They play crucial roles in the ecology and evolution of bacteria, including  
47 their pathogenicity as they can carry virulence factors such as toxins as well as antimicrobial  
48 resistance genes (3) (4–6). However, the global diversity of plasmids and distribution of  
49 antimicrobial resistance genes are yet to be revealed.

50 The presence of antimicrobial resistance genes on plasmids are of major interest in the clinical and  
51 veterinary areas since they can render prescribed antibiotics for treating pathogens ineffective. There  
52 have been a range of large-scale metagenomic-based surveys of antimicrobial resistance genes in  
53 soils, humans, animals, plants, and sewage (7–12). However, the genomic context of the AMR genes  
54 is largely unknown; for example, whether they are located in the bacterial genome or on plasmids.  
55 Such knowledge would be of great value to better assess their potential transmissibility rates and  
56 global impact of AMR-gene carrying plasmids on human health.

57 Plasmids are usually circular DNA elements in bacterial cells, but they can also occur in linear form  
58 and be present in archaea and eukaryotic organisms. The size of plasmids is highly variable, ranging  
59 from 1,000 bases to hundreds of kilobases. They are present in different quantities (copy numbers) in  
60 bacterial cells, varying from a single copy to hundreds of copies in a single cell. This intrinsic and  
61 unique nature of plasmids brings about several challenges in plasmidome research (i.e. research on  
62 the collective plasmid content in a sample). For example, the low plasmid/chromosome DNA ratio  
63 and potential low copy numbers can make it difficult to detect plasmids. These challenges are  
64 amplified when plasmidomes are examined from relatively low-cell-density environments such as  
65 wastewater. Even assembling and identifying plasmids with low copy number from high biomass  
66 samples including single isolates from whole genome sequencing (WGS) data can be challenging. To  
67 address these challenges, different approaches have been developed to increase the recovery of  
68 plasmids from WGS data (13–16).

69 Plasmids have now also been recovered from more complex microbiomes using a number of  
70 strategies. This includes multiple displacement amplification (MDA) with phi29 DNA polymerase  
71 prior to DNA sequencing (17), long read sequencing technology of plasmid DNA, or involvement of  
72 advanced assembly strategies (18–21). These studies have however been restricted to a single or few  
73 locations, and there is limited knowledge on similarity and differences between plasmids from a

74 range of geographical locations (22–26). We recently showed differences in the AMR gene profiles  
75 in urban sewage around the globe, but the location of these AMR genes in the bacteria remains  
76 unknown (7).

77 To explore the plasmidome of global sewage, which is characterized by low bacterial cell numbers  
78 and challenges to isolate plasmid DNA as previously shown (23–27), we here employ an optimized  
79 plasmid DNA isolation procedure, followed by both, plasmid-safe DNase treatment and MDA to  
80 obtain sufficient plasmid DNA for Oxford Nanopore sequencing from global urban sewage samples.  
81 To improve plasmidome characterizations, we develop an assembly workflow, utilizing the long-read  
82 length from the Oxford Nanopore MinION sequencer and Illumina sequences. We obtain thousands  
83 of circular candidate plasmid sequences and explore their predicted function.

84

## 85 ***Material and Methods***

### 86 ***Sample collection and preparation***

87 From the global sewage sample collection (7), we selected 24 samples from 22 countries (see Table  
88 S1 in the supplementary material). The samples originated from the five most populated continents  
89 on Earth and for which we had sufficient sample material available. From each sample, a sewage  
90 pellet was collected from 250 ml untreated sewage by centrifugation at 10,000xg for 10 minutes at  
91 5°C. The sewage pellets were stored at -80°C until use.

92

### 93 ***Plasmid DNA extraction and enrichment***

94 Plasmid DNA isolation was performed on individual sewage pellets (420 mg) using Plasmid  
95 Purification Mini Kit (Qiagen, Cat No./ID: 12123) with QIAGEN-tip 100 (Qiagen, Cat No./ID:  
96 10043) following the manufacturer's instruction with the following minor modifications: protein  
97 precipitation with P3 buffer mixture was incubated on ice for 15 minutes, elution buffer QF and EB  
98 buffer were preheated at 65°C prior to application, and the DNA pellet washing step was done using  
99 ice-cold 70% ethanol after isopropanol precipitation. LyseBlue dye for cell lysis indication was  
100 added, and all buffer volumes were adjusted to sewage pellet weight. The plasmid DNA pellet was  
101 dissolved in 35 µl EB buffer for 1 hour at room temperature. Linear chromosomal DNA was reduced  
102 by Plasmid-Safe ATP-Dependent DNase (Epicentre, USA) treatment for 24 hours at 37°C according  
103 to the manufacturer's instructions. The DNase was inactivated at 70°C for 30 minutes. To selectively  
104 enrich for circular DNA, the plasmid-Safe DNase-treated DNA was amplified using phi29 DNA  
105 polymerase (New England Biolabs, USA) following the manufacturer's instructions, similar to as  
106 previously described (22). The plasmid DNA is amplified through rolling circle amplification by the  
107 phi29 DNA polymerase using random primers, generating multiple DNA replication forks (17). This

108 results in long DNA fragments that contain tandem copies (tandem repeats) of the same plasmid.  
109 Blank controls were used during plasmid DNA extractions and plasmid enrichment treatments. All  
110 negative controls had undetectable DNA measurements using Qubit double-stranded DNA (dsDNA)  
111 BR assay kit on a Qubit 2.0 fluorometer (Invitrogen, Carlsbad, CA).

### 113 ***Plasmid DNA quality assessment***

114 The plasmid DNA yields from the sewage samples were evaluated using gel electrophoresis and  
115 Qubit double-stranded DNA (dsDNA) BR assay kit on a Qubit 2.0 fluorometer (Invitrogen, Carlsbad,  
116 CA). Plasmid DNA purity was measured and validated by absorbance ratio of 260/280 and 260/230  
117 using NanoDrop 100 (ThermoFisher). During pilot experiments that were aimed at protocol  
118 development and plasmid DNA enrichment, we also assessed the quality of our plasmid DNA  
119 preparations using a 2100 Bioanalyzer (Agilent).

### 121 ***Library preparation and Oxford Nanopore sequencing***

122 One  $\mu\text{g}$  plasmid DNA in  $45\ \mu\text{l}$  buffer was used for library preparation. DNA was used without  
123 fragmentation. End repair and dA-tailing were performed using NEBNext FFPE Repair Mix (New  
124 England BioLabs, 6630) and NEBNext® Ultra™ II End Repair/dA-Tailing Module (New England  
125 BioLabs, 7546). DNA was mixed with  $3.5\ \mu\text{l}$  NEBNext FFPE DNA Repair Buffer,  $2\ \mu\text{l}$  NEBNext  
126 FFPE DNA Repair Mix,  $3.5\ \mu\text{l}$  Ultra II End-prep reaction buffer and  $3\ \mu\text{l}$  Ultra II End-prep enzyme  
127 mix and volume was adjusted to  $60\ \mu\text{l}$  with nuclease-free water. The reaction tube was flicked 3  
128 times and incubated at  $20^\circ\text{C}$  for 10 minutes, then inactivated by heating at  $65^\circ\text{C}$  for 10 minutes.  
129 Clean-up was done using  $60\ \mu\text{l}$  Agencourt AMPure XP beads. The beads-reaction suspension was  
130 incubated on a HulaMixer at the lowest speed for 10 minutes, followed by two washes with freshly  
131 prepared 70% ethanol. DNA was then eluted from the beads in  $61\ \mu\text{l}$   $65^\circ\text{C}$  preheated nuclease-free  
132 water. A  $1\ \mu\text{l}$  DNA aliquot was assessed with Qubit dsDNA BR assay to ensure  $>700\ \text{ng}$  were  
133 recovered. A volume of  $60\ \mu\text{l}$  of dA-tailed plasmid DNA were added to  $25\ \mu\text{l}$  Ligation Buffer (LNB),  
134  $10\ \mu\text{l}$  NEBNext Quick T4 DNA Ligase NEBNext Quick Ligation Module (New England BioLabs,  
135 6056) and  $5\ \mu\text{l}$  Adapter Mix (AMX), and mixed by flicking the tube 3-4 times followed by incubation  
136 at room temperature for an extended time of 1 hr. The adaptor-ligated plasmid DNA was cleaned up  
137 by adding  $40\ \mu\text{l}$  Agencourt AMPure XP beads, and the reaction was mixed by flicking the tube and  
138 followed by incubation on a HulaMixer at the lowest speed for 10 minutes. The beads were pelleted  
139 and resuspended twice in  $250\ \mu\text{l}$  Long Fragment Buffer LFB buffer (SQK-LSK109 kit, Oxford  
140 Nanopore Technologies). The cleaned adaptor-ligated DNA was then eluted by incubating the pellet  
141 in  $15\ \mu\text{l}$  Elution Buffer (SQK-LSK109 kit, Oxford Nanopore Technologies) for 20 minutes at room  
142 temperature, then transferring the supernatant to a new tube as constructed library. Flowcell priming

143 and library loading preparation were performed according to the manufacturer's instruction (SQK-  
144 LSK109 kit, Oxford Nanopore Technologies). Libraries were loaded on FLO-MIN106 R 9.4.1  
145 Oxford Nanopore flowcells, and sequencing was run for 48 hours with MinKNOW software default  
146 settings.

147

### 148 ***Illumina Sequencing***

149 The enriched plasmid DNA samples were also subjected to Illumina NextSeq sequencing for  
150 downstream error-correction of contigs. Libraries were prepared using Nextera XT DNA Library  
151 Preparation Kit (Illumina, USA) following the manufacturer's instructions. The libraries were  
152 sequenced using NextSeq 550 system (Illumina) with 2 X 150 bp paired-end sequencing per flow  
153 cell.

154

### 155 ***Data processing***

156 Basecalling of Nanopore reads was performed using the guppy basecaller (version 3.0.3+7e7b7d0)  
157 with the dna\_r9.4.1\_450bps\_hac (high accuracy) configuration. Adapter trimming was performed  
158 using porechop (version 0.2.3) downloaded from <https://github.com/rrwick/Porechop> using the  
159 default parameters. Illumina sequencing data were quality and adapter trimmed using bbdduk from the  
160 bbmap suite (<https://sourceforge.net/projects/bbmap/>, version 38.23) using the following settings:  
161 qin=auto, k=19, rref=adapters.txt, mink=11, qtrim=r, trimq=20, minlength=50, tbo, zipllevel=6,  
162 overwrite=t, statscolumns=5.

163

### 164 ***Plasmid assembly from single Nanopore reads***

165 Nanopore reads shorter than 10,000 bases were discarded. Each remaining read was cut into 1,500  
166 bases long fragments and passed to the assembly step. The initial fragmentation step of the reads is  
167 needed since each read, amplified from a circular element during sample preparation, consists of  
168 multiple tandem repeats of the circular element. This is done to eliminate the tandem repeats as well  
169 as increase the accuracy of the resulting candidate plasmid DNA sequence. We set the cutting  
170 threshold to 1.5 kb to balance between preserving the benefits of long read sequencing and  
171 accounting for the error rate of Nanopore sequencing. We decided for a length threshold for cutting  
172 (i.e. 1.5 kbp) to not create candidate plasmid DNA sequences from small plasmids that contain  
173 multiple copies of the same plasmid. We set the cutting threshold to 1.5 kbp to balance between  
174 preserving the benefits of long read sequencing and the error rate of Nanopore sequencing. We also  
175 preferred to keeping the cutting threshold more towards the short range to not create candidate  
176 plasmids form small plasmids that contain multiple copies of the same plasmid sequence. Read



177 fragments originating from one single read were assembled using minimap2 (version 2.17-r943-dirty)  
178 in combination with miniasm version 0.3-r179 (parameter -s 800bp), and error corrected using racon  
179 version 1.3.3 (28–30). Assembled contigs were discarded if, after mapping the assembled contig back  
180 to the original Nanopore read, hits did not span more than 60% of the read, and if two hits overlapped  
181 by more than 50 bp. Assembled candidate contigs were error-corrected using 5 iterations of pilon  
182 version 1.23 using the respective Illumina reads from the same sample (31). Candidate contigs longer  
183 than 1,000 bases were used for downstream analyses. A schematic overview of the method is  
184 presented in Figure 1A.

### 186 ***Global plasmidome analysis***

187 To examine the obtained plasmids from our global sewage collection in relation to already known  
188 plasmids, we compared our obtained candidate plasmid DNA sequences to the DNA sequences in the  
189 plasmid database (PLSDB) using the webtool of PLSDB version 2019\_10\_07 (32). We used search  
190 strategy ‘Mash screen’ with a maximum p-value of 0.005 and minimum identity of 95%, as well as  
191 the option ‘winner-takes-all strategy. Samples with less than 100 circular assembled contigs were  
192 removed from the analysis as well as genera with less than 10 occurrences over all samples. A  
193 clustering of samples was performed using Euclidean distance of the clr-transformed values.  
194 Furthermore, all candidate plasmid sequences were sketched using MASH version 2.2 (33). The  
195 MASH-distances between all samples were calculated using default settings, resulting in a 24 by 24  
196 distance table that was used for principal component analysis.

### 198 ***Antimicrobial resistance gene detection analysis***

199 The trimmed Nanopore and Illumina reads were mapped against the ResFinder database (2020-01-  
200 25) using kma (version 1.3.0) (34, 35). The Nanopore reads were mapped with settings: mem\_mode,  
201 ef, nf, bcNano, and bc=0.7. Illumina reads were mapped with settings: mem\_mode, ef, nf, lt1, cge,  
202 and t=1. Resistance genes were counted across variants, for example the alleles tet(A)\_4\_AJ517790  
203 and tet(A)\_6\_AF534183 were both counted as tet(A). Centered log ratios were calculated using the  
204 pyCoDa package (<https://bitbucket.org/genomicpidemiology/pycodasrc/master/>).

### 206 ***Gene prediction and functional analysis***

207 Gene prediction was performed using prodigal version 2.6.3, and annotation of protein families was  
208 done using hmmscan from HMMER3 version 3.3.1 (<http://hmmer.org/>) against the pfam database  
209 version 33 (36, 37). Predicted genes as well as functional annotation were rejected if the p-value was  
210 above 0.000001. Gene ontology (GO) annotations for Pfam IDs were acquired using the mapping of  
211 Pfam entries to GO terms as described by Mitchell *et al.* (38).

212 To distinguish between potential plasmid and non-plasmid contigs, we used a scheme described  
213 previously (39). The scheme contains Pfam identifiers highly specific for plasmids and viruses.  
214 Proteins with a plasmid replication initiator protein Rep\_3 (PF01051) domain (n=24,824) were  
215 investigated further together with the full set of reference Rep\_3-domain proteins (n=1,637)  
216 downloaded from Pfam (version 33.1). The two data sets were combined and Rep\_3-domain proteins  
217 with a length of <40 aa residues were discarded, resulting in a data set of 16,930 Rep\_3 (PF01051)  
218 domain proteins. The protein sequences were aligned using MAFFT (version 7.221) as part of the  
219 Galaxy platform (40, 41). A phylogenetic tree was then build using FastTree (version 2.1.10) (42)  
220 and visualized using FigTree (version 1.4.4) (<https://github.com/rambaut/figtree/releases>).

221

### 222 *Generation of plasmid maps*

223 The 50 longest assemblies from each sample were annotated using Prokka (43). Contigs of interest  
224 were chosen for mapping based on the presence of known plasmid-encoded genes, such as replication  
225 and mobilization systems, toxin-antitoxin pairs, and AMR genes. Plasmids were inspected and  
226 visualized using DNAPlotter (44) and Geneious Prime version 2020.2.4 ([www.geneious.com](http://www.geneious.com)). If a  
227 coding sequence (CDS) from the Prokka analysis remained unannotated, it was manually annotated  
228 by using BLAST search function against the nr database (45) and scanned with HMMER3 against the  
229 Pfam database as described above.

230

231



## 232 **Results**

### 233 ***Nanopore and Illumina sequencing output from plasmid DNA-enriched global sewage*** 234 ***samples***

235 The sequencing of 24 plasmid-enriched DNA preparations from untreated sewage from 5 continents  
236 (Africa, Asia, Europe, North America, and South America) using Oxford Nanopore sequencing  
237 technology produced 1.2 to 9.7 Gbp (median 3.5 Gbp) sequencing data per sample (see Table S1 in  
238 the supplementary material). The median read length was 7.3 kb (range 1,075 to 11,018 bases) (see  
239 Figure S1 in the supplemental material). After quality trimming and removing sequences below  
240 10,000 bases, the median sequencing throughput was 1.9 Gbp and the median read length 23,000  
241 bases (see Table A at <https://doi.org/10.6084/m9.figshare.13395446>). The Illumina generated  
242 sequencing data per sample were between 1.5 and 9.7 Gbp with a median of 4.8 Gbp after adapter  
243 and quality trimming. A median of 41 million paired-end reads per sample were obtained (see Table  
244 B at <https://doi.org/10.6084/m9.figshare.13395446>).

### 246 ***Circular DNA sequences obtained using single Oxford Nanopore reads***

247 Upon assembly and polishing (Figure 1A), we obtained a total of 165,302 contigs from the 24  
248 sewage samples, of which 159,322 contigs (96.4%) were suggested by miniasm to be circular (Figure  
249 1B, and see Table C at <https://doi.org/10.6084/m9.figshare.13395446>). The longest assembled  
250 circular contig had a length of 17.4 kbp and was obtained from a sample in Brasil (BRA.1, South  
251 America). Most of the circular contigs were obtained from the Tanzanian (TZA, Africa) sewage  
252 sample, and they had an average length of 1.7 kbp (see Table C at  
253 <https://doi.org/10.6084/m9.figshare.13395446>).

### 255 ***Classification of assembled circular DNA elements***

256 To obtain information about the identity of the obtained circular DNA elements, we performed gene  
257 prediction, annotation, and classification based on plasmid- and virus/phage-specific Pfam domains  
258 (39). Overall, we detected Pfam domains (including domains of unknown function (DUF)) on  
259 47.01% of the circular elements, potentially suggesting the presence of many novel DNA sequences  
260 not encoding for known protein domains. For the DNA elements (circular & linear) for which Pfam  
261 domains were detected, the majority (88.39%) contained predicted genes with plasmid- or  
262 virus/phage-related Pfam entries (see Figure 2, Figure S2 in the supplementary material, and Table D  
263 at <https://doi.org/10.6084/m9.figshare.13395446>). Overall, we found 55,337 circular DNA elements  
264 that encoded for known plasmid-related Pfam domains (and not viral-related Pfam domains). The  
265 highest number of plasmid-related candidate sequences were detected in the sample from the Czech

266 Republic (CZE, Europe), followed by Tanzania (TZA, Africa), and Kosovo (XK, Europe). The  
267 sample from China (CHN, Asia) was the only sample from which more potential virus/phage-related  
268 contigs than candidate plasmids were obtained (see Figure 2, Figure S2 in the supplementary  
269 material, and Table D at <https://doi.org/10.6084/m9.figshare.13395446>).

270 On the circular elements with plasmid-related Pfam domains, protein families involved in plasmid  
271 replication were the most abundant and they included Relaxase, *Rep\_1*, *Rep\_2*, *Rep\_3*, *Rep\_trans*,  
272 *RepL*, and *Replicase* (Figure 2A). For example, we detected a total of 24,824 open reading frames  
273 with a plasmid replication initiator protein *Rep\_3* (PF01051) domain. Even though *Rep\_3*-domain  
274 proteins from all continents were observed across the phylogenetic tree, some clades mainly  
275 represented proteins from one continent, interspersed with protein sequences from other continents  
276 (Figure 2B). For instance, clades that mainly harbored proteins originating from Europe, also  
277 frequently contained protein sequences from North America and other continents. Clades dominated  
278 by *Rep\_3* (PF01051) domain proteins from Africa also frequently harbored similar proteins from  
279 South America.

280 Furthermore, protein families involved in plasmid mobilization were detected, such as *Mob\_Pre*,  
281 *MobA\_MobL*, and *MobC* (Figure 2A). In addition, we identified protein families related to  
282 virus/phage replication and capsid proteins, as well as protein domains binding to DNA (*HTH\_17*,  
283 *HTH\_23*, *HTH\_Crp\_2*) and that might be involved in regulating gene expression.

### 285 ***Global plasmidome pattern based on known plasmids***

286 To examine whether our collection of plasmid sequences contained already known sequences, we  
287 compared the obtained plasmid DNA sequences to the entries in the plasmid database (PLSDB). This  
288 analysis revealed that only 10.1% of our circular elements were similar to known plasmids (see Table  
289 E at <https://doi.org/10.6084/m9.figshare.13395446>). The majority of plasmids that exhibited some  
290 similarity to entries in the PLDB originated from *Acinetobacter* (33%), *Enterococcus* (21%) as well  
291 as *Flavobacterium* (10%); genera that were previously detected in these sewage microbiomes (7).

292 Overall, most plasmids with similarities to already known ones were found in the samples from India,  
293 Kosovo, Pakistan, Czech Republic, Iceland, and Brazil (see Table E at  
294 <https://doi.org/10.6084/m9.figshare.13395446>). Clustering analysis of the abundancies of plasmids  
295 with known relatives in PLSDB revealed three main clusters (Figure 3A). The first cluster comprised  
296 samples that overall exhibited a low number of known plasmids and included samples from Europe  
297 (ALB, POL, ESP, SVN) and a sample from Ghana. The second cluster included samples with  
298 plasmids from a large range of bacterial genera at higher abundance, and comprised samples from  
299 Europe (ISL, DEU, CZE), North America (USA.1, USA.2, CAN), India, Brazil and Tanzania. The  
300 third cluster comprised samples with known plasmids from few bacterial genera and included

301 samples from Asia (CHN, PAK), Africa (CIV), Europe (XK), and South America (ECU, PER)  
302 (Figure 3A).  
303 In a principal component analysis of the same data, a similar clustering was observed. Furthermore,  
304 along the first principal component, samples from Asia and Europe appeared to be most different  
305 from each other and with samples from Africa, and North and South America in between. Upon  
306 examining the particular reference plasmids and their bacterial hosts that were driving this pattern a  
307 similar observation was made: plasmids from bacterial hosts originating from Europe appeared to  
308 segregate along the first principle component from plasmids and their bacterial hosts originating from  
309 Asia (Figure 3B). This observation was supported by a cluster analysis on plasmid-level, in which  
310 five clusters were observed: Samples from Europe did not cluster with samples from Asia, and  
311 different sets of known plasmids were found in the samples from Europe and Asia, respectively (see  
312 Figure S3 in the supplemental material). Generally, only few known plasmids were detected in the  
313 samples from Albania, Slovenia, Spain, Poland, Ecuador, and Ghana (see Figure S3 in the  
314 supplementary material and Table E at <https://doi.org/10.6084/m9.figshare.13395446>).  
315 Given the large fraction of candidate plasmid sequences that did not exhibit similarity to already  
316 known plasmids, we performed a reference-independent analysis by calculating Mash-distances  
317 based on all plasmid sequences for each sample. In this analysis, the plasmidomes clustered in two  
318 main clusters (see Figure S4 in the supplemental material). The first cluster harbored all samples  
319 from Europe (with the exception of Poland), as well as the samples from Canada (North America),  
320 Pakistan and India (Asia), and Côte d'Ivoire (Africa). The second cluster harbored all samples from  
321 South America, both samples from the USA (North America), as well as Tanzania and Ghana  
322 (Africa), and China (Asia) (see Figure S4 in the supplemental material). This suggests that the  
323 sequence space encompassing novel plasmid sequences (i.e. those that did not exhibit similarity to  
324 sequences in the PLSDB) provides an extended, yet to be discovered, dimension into plasmid  
325 ecology and evolution.

### 326 327 ***Antimicrobial resistance genes in plasmidomes***

328 To gain insight into antimicrobial resistance genes on the plasmids from sewage, and compare them  
329 to those detected in the whole community of the same sewage samples, we performed a ResFinder  
330 analysis on three sequencing read data sets: whole community DNA sequenced using Illumina (7),  
331 plasmidome DNA sequenced using Illumina (this study), and plasmidome DNA sequenced using  
332 Nanopore sequencing (this study).

333 Overall, many of the antimicrobial resistance genes and antimicrobial classes that were detected  
334 using whole community sequencing, were also detected in the two plasmidome datasets, with a few  
335 exceptions. For example, the two antimicrobial classes macrolide-streptogramin B and lincosamide-

336 pleuromutilin-streptogramin A were not detected in the plasmidome samples in about half of the  
337 cases (Figure 4A, and see Figure S5A in the supplementary material, and Tables F and G at  
338 <https://doi.org/10.6084/m9.figshare.13395446>). Occasionally, also genes conferring resistance to  
339 other antimicrobial classes were not detected in individual plasmidome samples as compared to the  
340 whole community, and these included genes conferring resistance to lincosamide, phenicol, or  
341 aminoglycoside. It may be that genes that were detected more frequently in the whole community  
342 sample, as compared to the plasmidome samples, are preferentially encoded on the bacterial  
343 chromosomes or larger plasmids.

344 Conversely, genes conferring resistance to the antimicrobial classes macrolide-lincosamide-  
345 streptogramin B, as well as macrolide, and quinolone, were more frequently observed in the  
346 plasmidome samples (Figure 4A, and see Figure S5 in the supplementary material and Tables F and  
347 G at <https://doi.org/10.6084/m9.figshare.13395446>). The most frequently observed AMR genes  
348 related to these three classes were *ermB*, *ermT*, *ermF* (macrolide-lincosamide-streptogramin B),  
349 *mphE*, *mefA*, *msrD* (Macrolide), and *qnrB19*, *qnrD1*, *qnrD2*, *qnrD3*, *qnrVC4* (Quinolone). The  
350 higher frequency of those genes in the plasmidome samples may suggest that they are more  
351 frequently found on plasmids in general, or on smaller plasmids as compared to large ones. Another  
352 gene that was frequently observed across samples is *msrE*, and which was slightly higher abundant in  
353 plasmidomes (average abundance 15.4%, SEM 1.86) as compared to whole community samples  
354 (average abundance 11.5%, SEM 1.88). As examples, a few randomly chosen candidate plasmids and  
355 their encoded genes, including AMR genes, are displayed in Figure 4B.

### 357 ***Functional characterization of plasmidomes***

358 To gain further insight into the functions encoded on all circular elements, we obtained GO  
359 annotations for the predicted proteins through mapping of pfam entries to GO terms. A clustering  
360 analysis revealed the separation of plasmidomes into two main clusters (see Figure S6 in the  
361 supplemental material). Cluster 1 comprised samples from Europe (ISL, CZE, XK, DEU) as well as  
362 North America (USA.1, CAN) and South America (BRA.1, ECU). Cluster 2 comprised the samples  
363 from Asia (IND, PAK, CHN), Africa (TZA, CIV) and the remaining samples from Europe (POL,  
364 ESP, SVN) and South America (PER). This clustering based on protein functions appeared to have  
365 some similarity to the clustering based on nucleotide sequence similarity to known plasmids (Figure  
366 3). In both analyses, the European samples from ISL, CZE, and DEU exhibited similarities, while the  
367 other European samples from POL, ESP, SVN clustered together separately. Furthermore, in both  
368 analyses, samples from North America (USA.1, CAN) and South America (BRA.1) clustered with  
369 the European samples from ISL, CZE, and DEU.

370 Functions that appeared to be enriched in samples from cluster 1 include, conjugation, recombinase  
371 activity, DNA methylation, protein secretion (type IV secretion system), response to antibiotic, toxic  
372 substance binding, response to toxic substance, unidirectional conjugation, and bacteriocin immunity  
373 (see Figure S5 in the supplemental material). Cluster 2 appeared to overall have fewer proteins that  
374 could be annotated using this strategy, and the samples exhibited a higher diversity of functional  
375 patterns compared to samples from cluster 1. Some samples from cluster 2 exhibited an enrichment  
376 of proteins that may be related to viruses/phages, such as viral capsids, structural molecule activity,  
377 RNA binding, RNA helicase activity, and these were in particular samples that appeared to have a  
378 higher abundance of virus/phage related Pfam domains (Figure 2). The majority of samples in both  
379 clusters harbored proteins involved in plasmid maintenance (see Figure S6 in the supplemental  
380 material).

## 382 *Discussion*

383 This is the first study to investigate plasmidomes at a global scale using long read sequencing from  
384 sewage. We show that our approach facilitated the recovery of complete plasmids from complex  
385 metagenomic samples with a sufficient quality to perform gene prediction and functional annotation.  
386 In total, we obtained 165,302 DNA elements of which 159,322 were circular. The average length was  
387 1.9 kb (min 1 kbp, max 17.4 kbp), suggesting that mainly small plasmids were obtained. This might  
388 reflect the true distribution but could also be biased due to a number of reasons, for example, smaller  
389 plasmids are more stable and thus have higher chance of getting through the DNA extraction step  
390 undamaged. Since a DNase step was used to reduce the amount of chromosomal DNA, damaged  
391 plasmids might have been digested as well. Another possibility could be that some plasmids were  
392 already damaged during storage and transportation, as the sewage was frozen and shipped, and many  
393 of the samples arrived thawed and were frozen again. Another reason could be that our assembly  
394 workflow was not able to perform a successful assembly on larger plasmids with a high number of  
395 tandem-repeats.

396  
397 We identified a range of functions encoded on the candidate plasmids, including plasmid replication  
398 and maintenance, mobilization, conjugation, antimicrobial resistance, and bacteriocin immunity.  
399 However, not all plasmid-related DNA elements encoded for a plasmid-replication gene, suggesting  
400 that they may not be self-replicating DNA molecules. It should though be noted that also already  
401 described plasmids do not necessarily encode for a rep gene using current annotation algorithms.  
402 Furthermore, we found that about half of the circular DNA elements did not encode for any known  
403 Pfam domains. This could suggest that we detected many novel DNA sequences not encoding for



404 known protein domains. A hypothesis could be that a fraction of the circular DNA elements are novel  
405 extrachromosomal elements that are hitherto undescribed and may also originate from various  
406 domains of life, including bacteria, archaea, and eukaryotes (46–48). Alternatively, open reading  
407 frames might not always have been properly detected because of sequencing errors not corrected in  
408 the polishing steps with Nanopore and Illumina reads. This could certainly have contributed to it, as  
409 we occasionally observed fragmented genes due to remaining sequencing errors, even after polishing.  
410 This challenge may be alleviated with the ongoing improvement of Oxford Nanopore chemistry and  
411 basecalling algorithms. Nevertheless, collectively, we obtained 58,429 DNA elements (circular &  
412 linear) that encoded for proteins with plasmid-related Pfams, and 17,292 circular DNA elements  
413 exhibited sequence similarity to known plasmids, suggesting that we successfully discovered many  
414 novel candidate plasmid DNA sequences.

415

416 For candidate plasmids that exhibited some similarities to known plasmids, we found that they  
417 originated from bacterial taxa previously detected in these complex sewage samples, such as  
418 *Acinetobacter*, *Escherichia*, *Moraxella*, *Enterobacter*, *Bacteroides*, and *Klebsiella* (7). These genera  
419 include bacteria that are part of the human gut microbiome and/or opportunistic pathogens. Hence,  
420 some of these plasmids might play a role in gut microbial ecology and potential antimicrobial  
421 resistance transmission (49, 50). It should be noted, however, that overall, only ~10.1% of our  
422 circular elements were similar to known plasmids in the PLSDB, and which may be partly explained  
423 by differences in plasmid contents (plasmid average size 1.9 kbp (this study) and 53.2 kbp (PLSDB))  
424 (32). In line with this, we observed that the plasmidome samples clustered somewhat differently  
425 when all candidate plasmid sequences were taken into account (and not only those that exhibited  
426 similarity to known reference plasmids). It will be interesting to investigate our candidate plasmids  
427 further in future studies, ideally through involvement of more plasmidome samples and extended  
428 metadata. There may be a range of factors that may play role in explaining differences and  
429 similarities between plasmidomes, such as climate, population-related differences including human  
430 ethnicity, health status, sanitation, and economy including trading between countries.

431

432 Overall, AMR classes that were detected in the plasmidome sequencing data sets were also found in  
433 the sequencing data from the whole complex sewage samples, suggesting that the plasmidomes are a  
434 good representation of what is present in the complex samples. Some AMR gene classes, however,  
435 were more predominant in the whole community (e.g. macrolide-streptogramin B, lincosamide-  
436 pleuromutilin-streptogramin A), and others more in the plasmidomes (e.g. macrolide-lincosamide-  
437 streptogramin B, macrolide, and quinolone). This could suggest that the AMR genes conferring  
438 resistance to the latter AMR gene classes are preferentially located on plasmids as compared to

439 chromosomes. However, given that we mainly recovered small plasmids, it could also be an  
440 indication for that the AMR genes preferentially detected in the whole community may be located on  
441 large plasmids that were not recovered here. Whether certain abundant AMR genes in the  
442 plasmidomes are plasmid- or chromosome-associated may also be dependent on the particular  
443 bacterial host (see Figure S7 in the supplemental material) (51).

444  
445 While our approach and findings are a significant advancement to previous work, there are still  
446 aspects that can be improved in the future. For example, the assembly workflow could be improved  
447 to resolve remaining repetitive regions within the plasmid, as a range of circular elements still  
448 consisted of tandem-repeats of the actual plasmid sequence. This could potentially be solved by  
449 introducing a dynamic cutting step using the k-mer composition of the full read. Despite the high  
450 error rate of the Nanopore sequencing reads, the raw read should still contain a set of k-mers with 10-  
451 15 bases length that could help interfering the appropriate fragmentation length. In addition, the  
452 plasmid DNA isolation could be improved significantly to increase a) the overall amount of plasmid  
453 DNA (in order to avoid having to perform MDA), and b) the amount of larger plasmids. Further  
454 possibilities to identify new plasmids could also involve *in vivo* proximity-ligation Hi-C or single-cell  
455 sequencing that would also allow the discovery of new plasmids directly together with their host cell  
456 (52, 53).

457  
458 Overall, our study provides new insight about the technical applicability of long-read Nanopore  
459 sequencing for plasmidome analysis of complex biological samples, as well as a foundation for  
460 exploring plasmid ecology and evolution at a global scale. For example, we can now better explore  
461 the genomic context of AMR genes, and reveal whether they are located on the microbial  
462 chromosome or on mobile genetic elements such as plasmids. This knowledge is of great value in  
463 assessing the potential transmissibility of AMR genes with resulting impact on antibiotic treatments  
464 in the medical and veterinary sectors and the one health perspective. Furthermore, the dataset  
465 provides a valuable resource for further exploring extrachromosomal DNA elements including  
466 potential novel functions.

## 467 468 ***Acknowledgment***

469 This work was mainly supported by The Novo Nordisk Foundation (NNF16OC0021856: Global  
470 Surveillance of Antimicrobial Resistance), and partially by the European Union's Horizon 2020  
471 Research and Innovation Programme under grant agreement No 773830: One Health European Joint



472 Programme. The funders had no role in study design, data collection and interpretation, or the  
473 decision to submit the work for publication.

474 We thank Christina Aaby Svendsen (Technical University of Denmark) for technical support with the  
475 Illumina sequencing of the plasmidomes.

476 Sequencing data analysis was performed using the DeiC National Life Science Supercomputer at  
477 DTU.

478

### 479 ***Data availability***

480 The DNA sequences generated in this project are available through ENA/GenBank/DDBJ under the  
481 accession number PRJEB41171 (Nanopore reads: ERX4715074-ERX4715097; Illumina reads:

482 ERX5299122-ERX5299145; Assemblies: ERZ1694234-ERZ1694257). The code for the creation of  
483 assemblies is accessible from Github (<https://github.com/philDTU/plasmidPublication>) and

484 additional supplementary material is available at

485 [https://figshare.com/projects/A\\_Peek\\_into\\_the\\_Plasmidome\\_of\\_Global\\_Sewage/94448](https://figshare.com/projects/A_Peek_into_the_Plasmidome_of_Global_Sewage/94448).

486

## 487 **References**

- 488
- 489 1. Lederberg J. 1952. Cell Genetics and Hereditary Symbiosis. *Physiological Reviews* 32:403–430.
- 490 2. Cohen SN, Chang ACY, Boyer HW, Helling RB. 1973. Construction of Biologically Functional Bacterial  
491 Plasmids In Vitro. *PNAS* 70:3240–3244.
- 492 3. Rodríguez-Beltrán J, DelaFuente J, León-Sampedro R, MacLean RC, San Millán Á. 2021. Beyond  
493 horizontal gene transfer: the role of plasmids in bacterial evolution. *Nature Reviews Microbiology*  
494 <https://doi.org/10.1038/s41579-020-00497-1>.
- 495 4. Johnson TJ, Nolan LK. 2009. Pathogenomics of the Virulence Plasmids of *Escherichia coli*. *Microbiol Mol*  
496 *Biol Rev* 73:750–774.
- 497 5. Bratu S, Brooks S, Burney S, Kochar S, Gupta J, Landman D, Quale J. 2007. Detection and Spread of  
498 *Escherichia coli* Possessing the Plasmid-Borne Carbapenemase KPC-2 in Brooklyn, New York. *Clin Infect*  
499 *Dis* 44:972–975.
- 500 6. Tian G-B, Doi Y, Shen J, Walsh TR, Wang Y, Zhang R, Huang X. 2017. MCR-1-producing *Klebsiella*  
501 *pneumoniae* outbreak in China. *The Lancet Infectious Diseases* 17:577.
- 502 7. Hendriksen RS, Munk P, Njage P, Bunnik B, McNally L, Lukjancenko O, Röder T, Nieuwenhuijse D,  
503 Pedersen SK, Kjeldgaard J, Kaas RS, Clausen PTLC, Vogt JK, Leekitcharoenphon P, Schans MGM, Zuidema  
504 T, Husman AMR, Rasmussen S, Petersen B, Bego A, Rees C, Cassar S, Coventry K, Collignon P,  
505 Allerberger F, Rahube TO, Oliveira G, Ivanov I, Vuthy Y, Sopheak T, Yost CK, Ke C, Zheng H, Baisheng L,  
506 Jiao X, Donado-Godoy P, Coulibaly KJ, Jergović M, Hrenovic J, Karpíšková R, Villacis JE, Legesse M,  
507 Eguale T, Heikinheimo A, Malania L, Nitsche A, Brinkmann A, Saba CKS, Kocsis B, Solymosi N,  
508 Thorsteinsdottir TR, Hatha AM, Alebouyeh M, Morris D, Cormican M, O'Connor L, Moran-Gilad J, Alba  
509 P, Battisti A, Shakenova Z, Kiiyukia C, Ng'eno E, Raka L, Avsejenko J, Bērziņš A, Bartkevics V, Penny C,  
510 Rajandas H, Parimannan S, Haber MV, Pal P, Jeunen G-J, Gemmell N, Fashae K, Holmstad R, Hasan R,  
511 Shakoor S, Rojas MLZ, Wasyl D, Bosevska G, Kochubovski M, Radu C, Gassama A, Radosavljevic V,

- 512 Wuertz S, Zuniga-Montanez R, Tay MYF, Gavačová D, Pastuchova K, Truska P, Trkov M, Esterhuyse K,  
513 Keddy K, Cerdà-Cuéllar M, Pathirage S, Norrgren L, Örn S, Larsson DGJ, Van der Heijden T, Kumburu HH,  
514 Sanneh B, Bidjada P, Njanpop-Lafourcade B-M, Nikiema-Pessinaba SC, Levent B, Meschke JS, Beck NK,  
515 Van CD, Do Phuc N, Tran DMN, Kwenda G, Tabo D, Wester AL, Cuadros-Orellana S, Amid C, Cochrane G,  
516 Sicheritz-Ponten T, Schmitt H, Alvarez JRM, Aidara-Kane A, Pamp SJ, Lund O, Hald T, Woolhouse M,  
517 Koopmans MP, Vigre H, Petersen TN, Aarestrup FM. 2019. Global monitoring of antimicrobial resistance  
518 based on metagenomics analyses of urban sewage. *Nature Communications* 10:1124.
- 519 8. Munk P, Knudsen BE x000E6 r, Lukjacenko O, Duarte ASR, Gompel L, Luiken REC, Smit LAM, Schmitt H,  
520 Garcia AD, Hansen RB, Petersen TN, Bossers A, x000E9 ER, Graveland H, van Essen A, Gonzalez-Zorn B,  
521 Moyano G, Sanders P, Chauvin C, David J, Battisti A, Caprioli A, Dewulf J, Blaha T, Wadepohl K, Brandt  
522 M, Wasyl D, ska MS x00144, Zajac M, Daskalov H, Saatkamp HW, rk KDCS x000E4, Lund O, Hald T, Pamp  
523 S x000FC nje J, Vigre H x000E5 kan, Heederik D, Wagenaar JA, Mevius D, Aarestrup FM. 2018.  
524 Abundance and diversity of the faecal resistome in slaughter pigs and broilers in nine European  
525 countries. *Nature Microbiology* 1–14.
- 526 9. Campbell TP, Sun X, Patel VH, Sanz C, Morgan D, Dantas G. 2020. The microbiome and resistome of  
527 chimpanzees, gorillas, and humans across host lifestyle and geography. 6. *The ISME Journal* 14:1584–  
528 1599.
- 529 10. Chen Q-L, Cui H-L, Su J-Q, Penuelas J, Zhu Y-G. 2019. Antibiotic Resistomes in Plant Microbiomes.  
530 *Trends in Plant Science* 24:530–541.
- 531 11. Forsberg KJ, Patel S, Gibson MK, Lauber CL, Knight R, Fierer N, Dantas G. 2014. Bacterial phylogeny  
532 structures soil resistomes across habitats. 7502. *Nature* 509:612–616.
- 533 12. Carr VR, Witherden EA, Lee S, Shoaie S, Mullany P, Proctor GB, Gomez-Cabrero D, Moyes DL. 2020.  
534 Abundance and diversity of resistomes differ between healthy human oral cavities and gut. 1. *Nature*  
535 *Communications* 11:693.

- 536 13. Wick RR, Judd LM, Gorrie CL, Holt KE. 2017. Unicycler: Resolving bacterial genome assemblies from  
537 short and long sequencing reads. *PLOS Computational Biology* 13:e1005595.
- 538 14. Antipov D, Hartwick N, Shen M, Raiko M, Lapidus A, Pevzner PA. 2016. plasmidSPAdes: assembling  
539 plasmids from whole genome sequencing data. *Bioinformatics* 32:3380–3387.
- 540 15. Vielva L, de Toro M, Lanza VF, de la Cruz F. 2017. PLACNETw: a web-based tool for plasmid  
541 reconstruction from bacterial genomes. *Bioinformatics* 33:3796–3798.
- 542 16. Rozov R, Brown Kav A, Bogumil D, Shterzer N, Halperin E, Mizrahi I, Shamir R. 2017. Recycler: an  
543 algorithm for detecting plasmids from de novo assembly graphs. *Bioinformatics* 33:475–482.
- 544 17. Dean FB, Nelson JR, Giesler TL, Lasken RS. 2001. Rapid Amplification of Plasmid and Phage DNA Using  
545 Phi29 DNA Polymerase and Multiply-Primed Rolling Circle Amplification. *Genome Res* 11:1095–1099.
- 546 18. Che Y, Xia Y, Liu L, Li A-D, Yang Y, Zhang T. 2019. Mobile antibiotic resistome in wastewater treatment  
547 plants revealed by Nanopore metagenomic sequencing 1–13.
- 548 19. Bertrand D, Shaw J, Kalathiyappan M, Ng AHQ, Kumar MS, Li C, Dvornicic M, Soldo JP, Koh JY, Tong C,  
549 Ng OT, Barkham T, Young B, Marimuthu K, Chng KR, Sikic M, Nagarajan N. 2019. Hybrid metagenomic  
550 assembly enables high-resolution analysis of resistance determinants and mobile elements in human  
551 microbiomes. *Nature Biotechnology* 1–15.
- 552 20. Antipov D, Raiko M, Lapidus A, Pevzner PA. 2019. Plasmid detection and assembly in genomic and  
553 metagenomic datasets. *Genome Res* gr.241299.118.
- 554 21. Jørgensen TS, Hansen MA, Xu Z, Tabak MA, Sørensen SJ, Hansen LH. 2017. Plasmids, Viruses, And Other  
555 Circular Elements In Rat Gut. *bioRxiv* 143420.
- 556 22. Kav AB, Sasson G, Jami E, Doron-Faigenboim A, Benhar I, Mizrahi I. 2012. Insights into the bovine rumen  
557 plasmidome. *PNAS* 109:5452–5457.

- 558 23. Kav AB, Rozov R, Bogumil D, Sørensen SJ, Hansen LH, Benhar I, Halperin E, Shamir R, Mizrahi I. 2020.  
559 Unravelling plasmidome distribution and interaction with its hosting microbiome. *Environmental*  
560 *Microbiology* 22:32–44.
- 561 24. Zhang T, Zhang X-X, Ye L. 2011. Plasmid Metagenome Reveals High Levels of Antibiotic Resistance  
562 Genes and Mobile Genetic Elements in Activated Sludge. *PLOS ONE* 6:e26041.
- 563 25. Sentchilo V, Mayer AP, Guy L, Miyazaki R, Green Tringe S, Barry K, Malfatti S, Goessmann A, Robinson-  
564 Rechavi M, van der Meer JR. 2013. Community-wide plasmid gene mobilization and selection. 6. *The*  
565 *ISME Journal* 7:1173–1186.
- 566 26. Kothari A, Wu Y-W, Chandonia J-M, Charrier M, Rajeev L, Rocha AM, Joyner DC, Hazen TC, Singer SW,  
567 Mukhopadhyay A. 2019. Large Circular Plasmids from Groundwater Plasmidomes Span Multiple  
568 Incompatibility Groups and Are Enriched in Multimetal Resistance Genes. *mBio* 10.
- 569 27. Kav AB, Sasson G, Jami E, Doron-Faigenboim A, Benhar I, Mizrahi I. 2012. Insights into the bovine rumen  
570 plasmidome. *PNAS* 109:5452–5457.
- 571 28. Li H. 2018. Minimap2: pairwise alignment for nucleotide sequences. *Bioinformatics* 34:3094–3100.
- 572 29. Li H. 2016. Minimap and miniasm: fast mapping and de novo assembly for noisy long sequences.  
573 *Bioinformatics* 32:2103–2110.
- 574 30. Vaser R, Sović I, Nagarajan N, Šikić M. 2017. Fast and accurate de novo genome assembly from long  
575 uncorrected reads. *Genome Res* 27:737–746.
- 576 31. Walker BJ, Abeel T, Shea T, Priest M, Abouelliel A, Sakthikumar S, Cuomo CA, Zeng Q, Wortman J, Young  
577 SK, Earl AM. 2014. Pilon: An Integrated Tool for Comprehensive Microbial Variant Detection and  
578 Genome Assembly Improvement. *PLOS ONE* 9:e112963.
- 579 32. Galata V, Fehlmann T, Backes C, Keller A. 2019. PLSDb: a resource of complete bacterial plasmids.  
580 *Nucleic Acids Res* 47:D195–D202.

- 581 33. Ondov BD, Treangen TJ, Melsted P, Mallonee AB, Bergman NH, Koren S, Phillippy AM. 2016. Mash: fast  
582 genome and metagenome distance estimation using MinHash. *Genome Biology* 17:132.
- 583 34. Zankari E, Hasman H, Cosentino S, Vestergaard M, Rasmussen S, Lund O, Aarestrup FM, Larsen MV.  
584 2012. Identification of acquired antimicrobial resistance genes. *Journal of Antimicrobial Chemotherapy*  
585 67:2640–2644.
- 586 35. Clausen PTLC, Aarestrup FM, Lund O. 2018. Rapid and precise alignment of raw reads against  
587 redundant databases with KMA. *BMC Bioinformatics* 19:307.
- 588 36. Hyatt D, Chen G-L, Locascio PF, Land ML, Larimer FW, Hauser LJ. 2010. Prodigal: prokaryotic gene  
589 recognition and translation initiation site identification. *BMC Bioinformatics* 11:11:119.
- 590 37. El-Gebali S, Mistry J, Bateman A, Eddy SR, Luciani A, Potter SC, Qureshi M, Richardson LJ, Salazar GA,  
591 Smart A, Sonnhammer ELL, Hirsh L, Paladin L, Piovesan D, Tosatto SCE, Finn RD. 2019. The Pfam protein  
592 families database in 2019. *Nucleic Acids Res* 47:D427–D432.
- 593 38. Mitchell A, Chang H-Y, Daugherty L, Fraser M, Hunter S, Lopez R, McAnulla C, McMenamin C, Nuka G,  
594 Pesseat S, Sangrador-Vegas A, Scheremetjew M, Rato C, Yong S-Y, Bateman A, Punta M, Attwood TK,  
595 Sigrist CJA, Redaschi N, Rivoire C, Xenarios I, Kahn D, Guyot D, Bork P, Letunic I, Gough J, Oates M, Haft  
596 D, Huang H, Natale DA, Wu CH, Orengo C, Sillitoe I, Mi H, Thomas PD, Finn RD. 2015. The InterPro  
597 protein families database: the classification resource after 15 years. *Nucleic Acids Res* 43:D213–D221.
- 598 39. Jørgensen TS, Hansen MA, Xu Z, Tabak MA, Sørensen SJ, Hansen LH. 2017. Plasmids, Viruses, And Other  
599 Circular Elements In Rat Gut. *bioRxiv* 143420.
- 600 40. Katoh K, Standley DM. 2013. MAFFT Multiple Sequence Alignment Software Version 7: Improvements  
601 in Performance and Usability. *Molecular Biology and Evolution* 30:772–780.
- 602 41. Afgan E, Baker D, Batut B, van den Beek M, Bouvier D, Čech M, Chilton J, Clements D, Coraor N, Grüning  
603 BA, Guerler A, Hillman-Jackson J, Hiltemann S, Jalili V, Rasche H, Soranzo N, Goecks J, Taylor J,

- 604 Nekrutenko A, Blankenberg D. 2018. The Galaxy platform for accessible, reproducible and collaborative  
605 biomedical analyses: 2018 update. *Nucleic Acids Research* 46:W537–W544.
- 606 42. Price MN, Dehal PS, Arkin AP. 2010. FastTree 2 – Approximately Maximum-Likelihood Trees for Large  
607 Alignments. *PLOS ONE* 5:e9490.
- 608 43. Seemann T. 2014. Prokka: rapid prokaryotic genome annotation. *Bioinformatics* 30:2068–2069.
- 609 44. Carver T, Thomson N, Bleasby A, Berriman M, Parkhill J. 2009. DNAPlotter: circular and linear  
610 interactive genome visualization. *Bioinformatics* 25:119–120.
- 611 45. Altschul SF, Gish W, Miller W, Myers EW, Lipman DJ. 1990. Basic local alignment search tool. *Journal of*  
612 *molecular biology* 215:403–410.
- 613 46. Lanciano S, Carpentier M-C, Llauro C, Jobet E, Robakowska-Hyzorek D, Lasserre E, Ghesquière A,  
614 Panaud O, Mirouze M. 2017. Sequencing the extrachromosomal circular mobilome reveals  
615 retrotransposon activity in plants. *PLOS Genetics* 13:e1006630.
- 616 47. Shibata Y, Kumar P, Layer R, Willcox S, Gagan JR, Griffith JD, Dutta A. 2012. Extrachromosomal  
617 microDNAs and chromosomal microdeletions in normal tissues. *Science* 336:82–86.
- 618 48. Møller HD, Mohiyuddin M, Prada-Luengo I, Sailani MR, Halling JF, Plomgaard P, Maretty L, Hansen AJ,  
619 Snyder MP, Pilegaard H, Lam HYK, Regenber B. 2018. Circular DNA elements of chromosomal origin  
620 are common in healthy human somatic tissue. 1. *Nature Communications* 9:1069.
- 621 49. San Millan A. 2018. Evolution of Plasmid-Mediated Antibiotic Resistance in the Clinical Context. *Trends*  
622 *in Microbiology* 26:978–985.
- 623 50. Ogilvie LA, Firouzmand S, Jones BV. 2012. Evolutionary, ecological and biotechnological perspectives on  
624 plasmids resident in the human gut mobile metagenome. *Bioengineered* 3:13–31.



- 625 51. Alcock BP, Raphenya AR, Lau TTY, Tsang KK, Bouchard M, Edalatmand A, Huynh W, Nguyen A-LV, Cheng  
626 AA, Liu S, Min SY, Miroshnichenko A, Tran H-K, Werfalli RE, Nasir JA, Oloni M, Speicher DJ, Florescu A,  
627 Singh B, Faltyn M, Hernandez-Koutoucheva A, Sharma AN, Bordeleau E, Pawlowski AC, Zubyk HL,  
628 Dooley D, Griffiths E, Maguire F, Winsor GL, Beiko RG, Brinkman FSL, Hsiao WWL, Domselaar GV,  
629 McArthur AG. 2020. CARD 2020: antibiotic resistome surveillance with the comprehensive antibiotic  
630 resistance database. *Nucleic Acids Res* 48:D517–D525.
- 631 52. Stalder T, Press MO, Sullivan S, Liachko I, Top EM. 2019. Linking the resistome and plasmidome to the  
632 microbiome. *10. The ISME Journal* 13:2437–2446.
- 633 53. Lan F, Demaree B, Ahmed N, Abate AR. 2017. Single-cell genome sequencing at ultra-high- throughput  
634 with microfluidic droplet barcoding. *Nature Biotechnology* 35:640–646.

635

636

637 ***Figure legends***

638  
639 **Figure 1. Schematic overview of the single read assembly workflow and size distribution of**

640 **assembled reads.** A) Nanopore reads (based on plasmid DNA amplified with phi29) longer than  
641 10,000 bases were split into 1,500 bases long fragments. The sequence fragments were then  
642 assembled using minimap2 and miniasm and subsequently polished two times: 1. with the Nanopore  
643 fragments using racon and 2. with the Illumina reads using pilon. B) The size distribution of circular  
644 (orange) and linear (violet) assembled elements. These are the candidate plasmid sequences that  
645 successfully mapped to the original Nanopore read (i.e. covering more than 60% of the read, and not  
646 overlapping by more than 50 bp for multiple hits). Of the total 165,302 assemblies, 159,322 were  
647 characterized to be circular and 5,980 to be linear.

648  
649 **Figure 2. Functional characterization of circular DNA elements based on protein families.** A)

650 The bar plot displays the fraction of Pfam identifiers assigned to predicted proteins on the circular  
651 elements. The 31 Pfam identifiers represent the Top10 Pfam identifiers for each sample. Protein  
652 domains specifically involved in plasmid mobilization and plasmid replication are indicated by red  
653 and blue colors, respectively (see legend to the bottom right). Virus/phage related Pfam identifiers  
654 are indicated in green colors. Remaining Pfam identifiers are grouped (other) and indicated by dark  
655 grey. B) The dataset of proteins with a Rep\_3 (PF01051) domain (n= 24,824) were combined  
656 together with the 1,637 reference Rep\_3 (PF01051) proteins from Pfam. The protein sequences with  
657 a length of  $\geq 40$  aa (n=16,930) were aligned using MAFFT. A phylogenetic tree was build using  
658 FastTree and visualized using FigTree. A high-resolution version of the phylogenetic tree is available  
659 from Figshare at <https://doi.org/10.6084/m9.figshare.14112992>.

660  
661 **Figure 3. Comparison of candidate plasmids from global sewage with known plasmids in**

662 **plasmid database (PLSDB).** A) Heat map of centered log ratio (clr)-transformed abundancies of  
663 plasmid candidates assigned to plasmids in the PLSDB at bacterial genus level. The phylum level is  
664 indicated in parenthesis, A: Actinobacteria; B: Bacteroidetes; aP: alpha-Proteobacteria; bP: beta-  
665 Proteobacteria; gP: gamma-Proteobacteria; F: Firmicutes. Clustering of samples was performed using  
666 Euclidean distance of the clr-transformed values. B) Principal component analysis of clr-transformed  
667 abundancies of known plasmids detected by the PLSDB. The plot on the top reveals similarities and  
668 differences between samples. The plot in the bottom reveals the known plasmids that drive the  
669 partitioning of the samples, with 17.6% of the variation explained by the first and 11.1% by the  
670 second principal component.

672 **Figure 4. Antimicrobial resistance profiles from the whole community and plasmidomes from**  
673 **global sewage. A)** Bar plot displaying the proportions of antimicrobial resistance classes detected in  
674 a ResFinder-based analysis using the Illumina reads from the whole community, as well as Illumina  
675 reads from the plasmid preparations and Nanopore reads from the plasmid preparations. B) Six  
676 examples of candidate plasmids are visualized in plasmid maps. The outermost black circle indicates  
677 the plasmid chromosome, the coding sequence regions are colored according to their predicted  
678 function: replication (blue), mobilization (violet), transposition of DNA (green), antimicrobial  
679 resistance (red), toxin-antitoxin systems (orange), hypothetical proteins (hp) and other proteins  
680 (grey). The blue and green line indicate the GC and AT-content, respectively. The plasmids are  
681 named according to their origin, CIV (Côte d'Ivoire), POL (Poland), USA.1 (USA), BRA (Brasil),  
682 CZE (Czechia), and IND (India). Some sequencing errors might still be present in the candidate  
683 plasmid sequences, which are likely the reason why a few open reading frames are not properly  
684 predicted and appear fragmented, such as the gene encoding for AmpC and Macrolide efflux pump  
685 genes in the plasmid from Czechia. A detailed description about the plasmids is available from  
686 Figshare at <https://doi.org/10.6084/m9.figshare.14039390>.

687 **Table S1.** Sewage sample information.  
688

689 **Figure S1: Length of nanopore sequencing reads.** The violin plot displays log transformed read  
690 lengths. The horizontal dashed lines indicate log values for 1.000 and 10.000 bases length,  
691 respectively. Most reads exhibit a read length below 10.000 bases, which is the cut-off value for our  
692 assembly workflow, and most of the reads are between 1.000 and 10.000 bases long.  
693

694 **Figure S2. Plasmid and virus (phage)-related circular DNA elements.** The bar plots display the  
695 fraction (A) and total counts (B) of circular contigs containing Pfam IDs specific for plasmid and  
696 virus/phage -related proteins per sample. Each predicted protein by prodigal was searched against the  
697 pfam databases using HMMER hmmscan and filtered for a p-value less than 0.00001. In a small  
698 subset of assemblies we identify both viral and plasmid associated genes. Pfam ID's classified as  
699 "other than plasmid & viral" might still be plasmid relevant; they are just not specified as plasmid-  
700 related based on the stringent scheme used.  
701

702 **Figure S3. Comparison to known plasmids in plasmid database (PLSDB) – clustering on**  
703 **individual plasmid level.** Samples with less than 100 circular assembled contigs were removed from  
704 the analysis as well as plasmids with less than 10 occurrences over all samples. Clustering of samples  
705 (columns) was done using Euclidean distance of the centered log ratio (clr)-transformed values.

706

707 **Figure S4. Comparison between plasmidome samples – MASH distances.** All plasmid candidate  
708 sequences for each sample from the five examined continents were sketched using MASH, distances  
709 calculated, and visualized by principal component analysis. A) This plot displays the differences and  
710 similarities between all 24 plasmidome samples. B) This plot displays the differences and similarities  
711 between 22 plasmidome samples (all samples, except NGA and BRA.2).

712

713 **Figure S5. Heatmaps depicting antimicrobial resistance profiles from the whole community  
714 and plasmidomes from global sewage** based on presence/absence (A) and centered log ratio (clr)-  
715 transformed abundancies (B) of antimicrobial resistance gene classes. The antimicrobial resistance  
716 genes were identified in a ResFinder-based analysis using the Illumina reads from the whole  
717 community, Illumina reads from the plasmid preparations, and Nanopore reads from the plasmid  
718 preparations.

719

720 **Figure S6. Functional characterization of circular DNA elements – GO annotation.** The heat  
721 map displays centered log ratio (clr)-transformed abundancies of GO annotations assigned to  
722 predicted proteins. Samples with less than 100 circular assembled contig were remove from the  
723 analysis as well as GO identifiers with less than 10 occurrences over all samples. The clustering of  
724 samples was performed using Euclidean distance of the clr-transformed values resulting in 2 main  
725 clusters.

726 **Figure S7. Comparison of AMR genes with prevalence data by CARD**

727 (<https://card.mcmaster.ca>). The most frequently observed AMR genes that were more abundant in  
728 plasmidomes (as compared to in the whole community sequencing data) were explored at the CARD  
729 website. Here, the prevalence for AMR genes is presented for a selection of pathogens, whether they  
730 are associated with the plasmid or chromosome. The prevalence data are calculated as follows:

731 Antimicrobial resistance (AMR) molecular prevalence data were generated using the Resistance  
732 Gene Identifier (RGI), a tool for putative AMR gene detection from submitted sequence data using  
733 the AMR detection models available in CARD. To generate prevalence data, RGI was used to  
734 analyze molecular sequence data available in NCBI Genomes for 88 pathogens of interest. For each  
735 of these pathogens, complete chromosome sequences, complete plasmid sequences, and whole  
736 genome shotgun (WGS) assemblies were analyzed individually by RGI. RGI results were then  
737 aggregated to calculate percent occurrence. (See also Alcock *et al.*, NAR, 2020,  
738 <https://academic.oup.com/nar/article/48/D1/D517/5608993>).

739



A

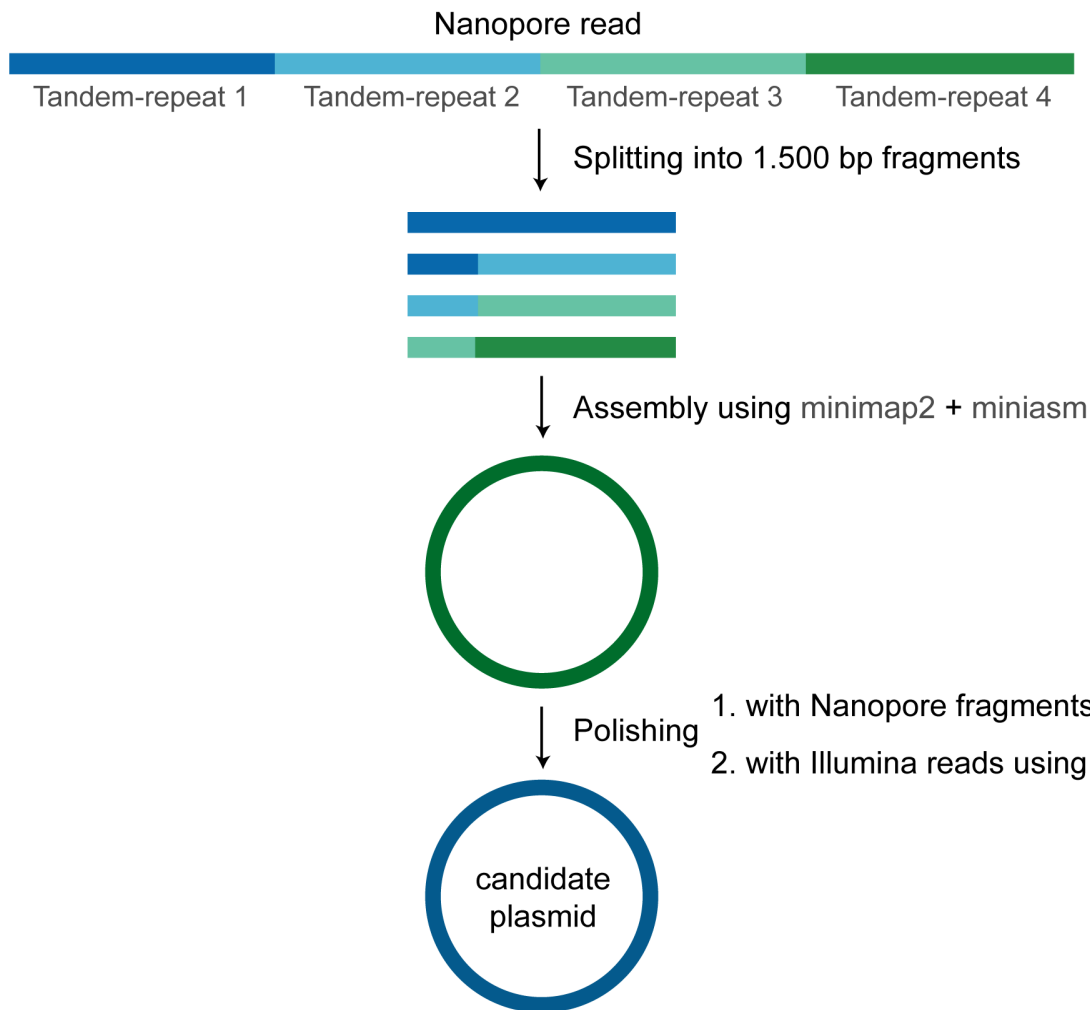

B

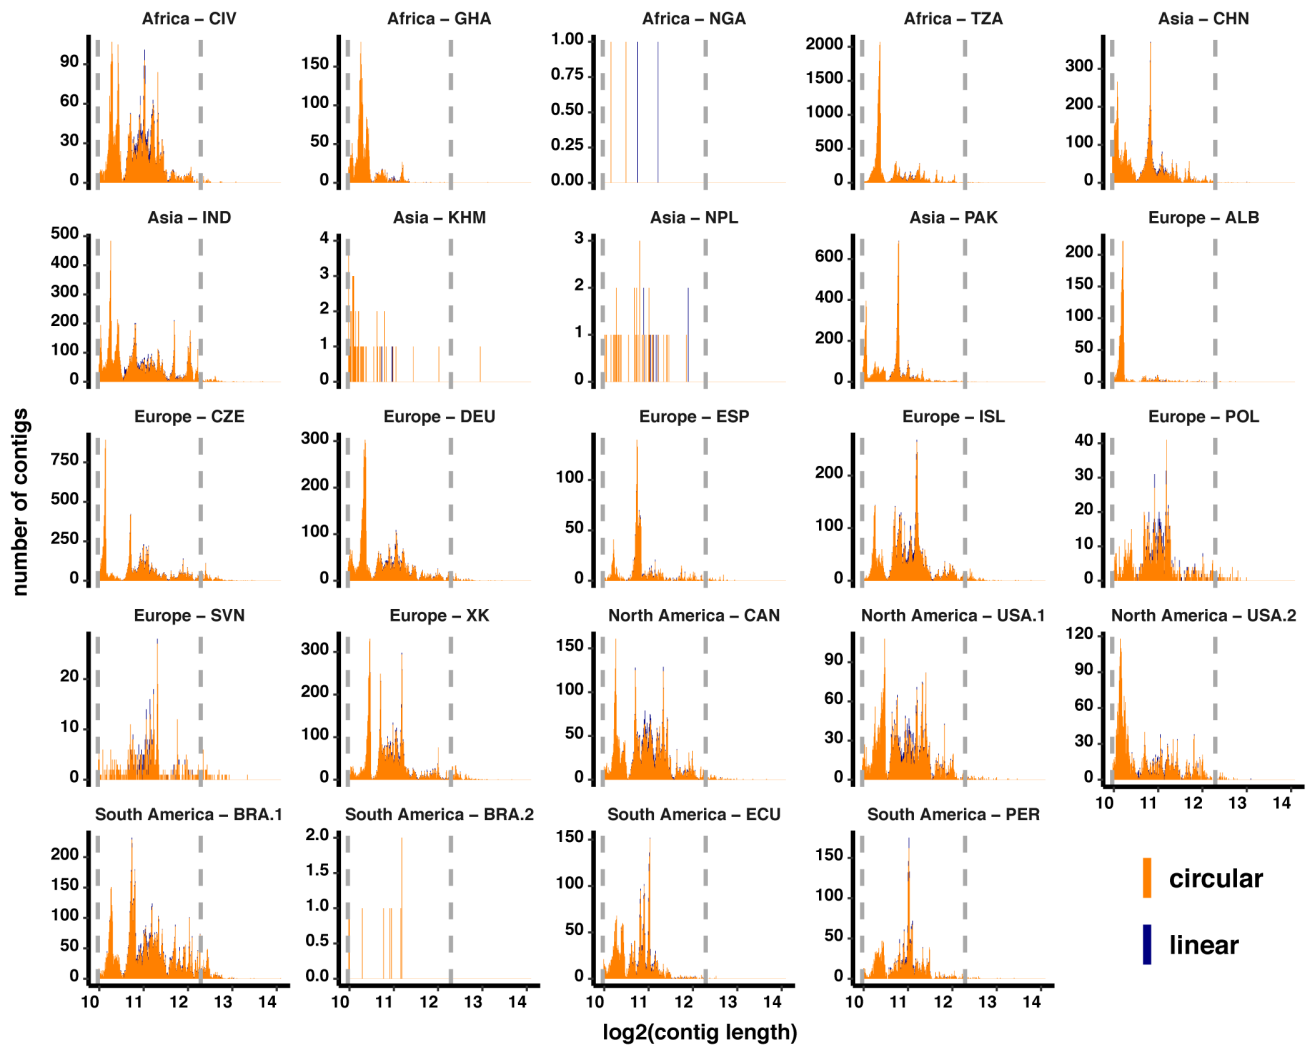

A

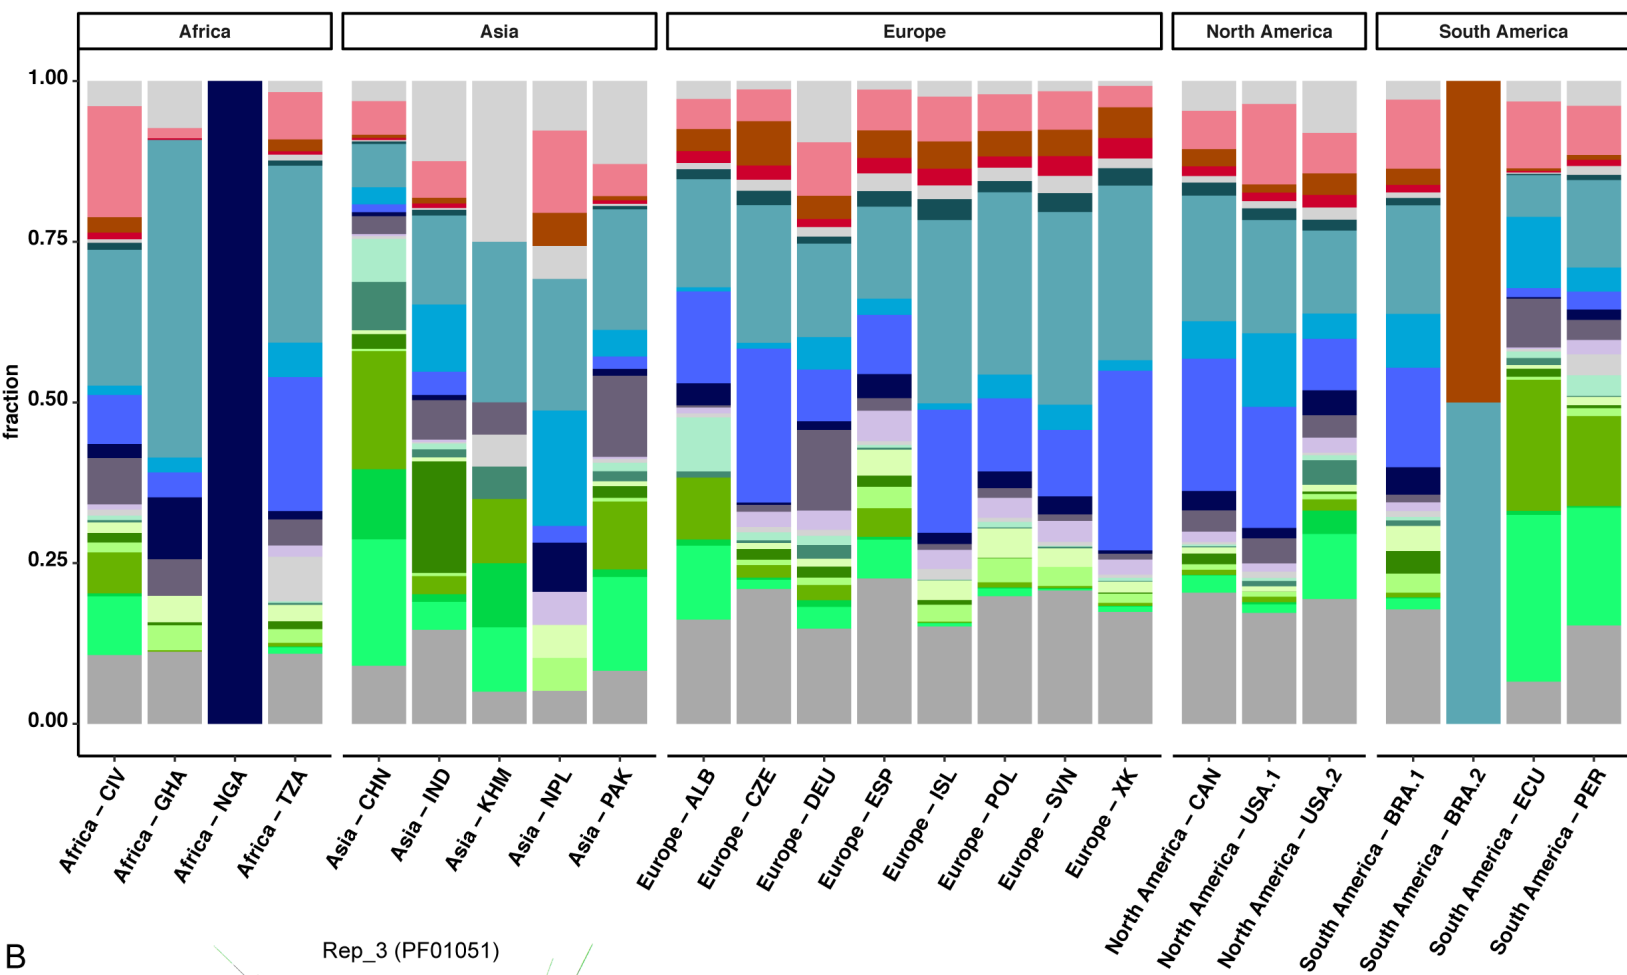

B

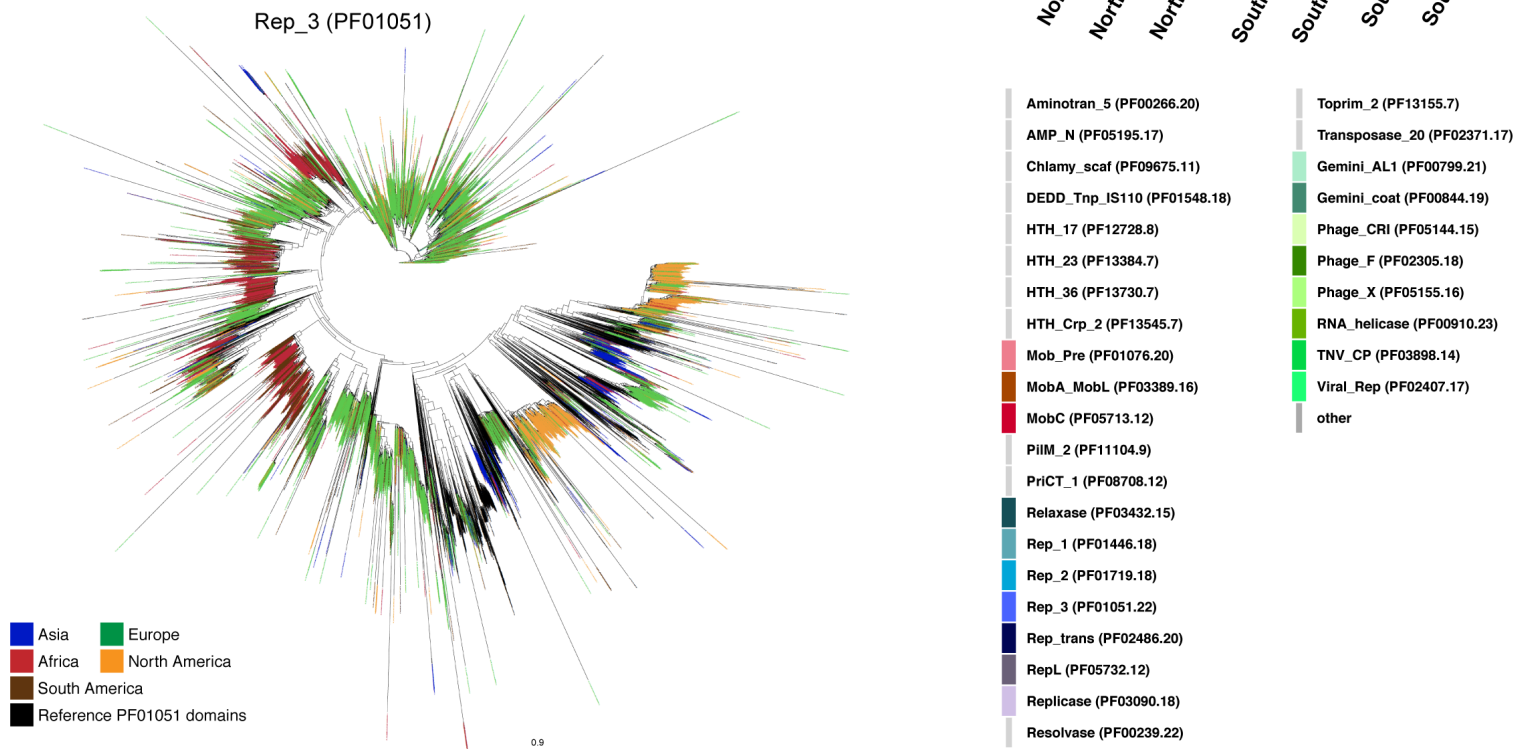



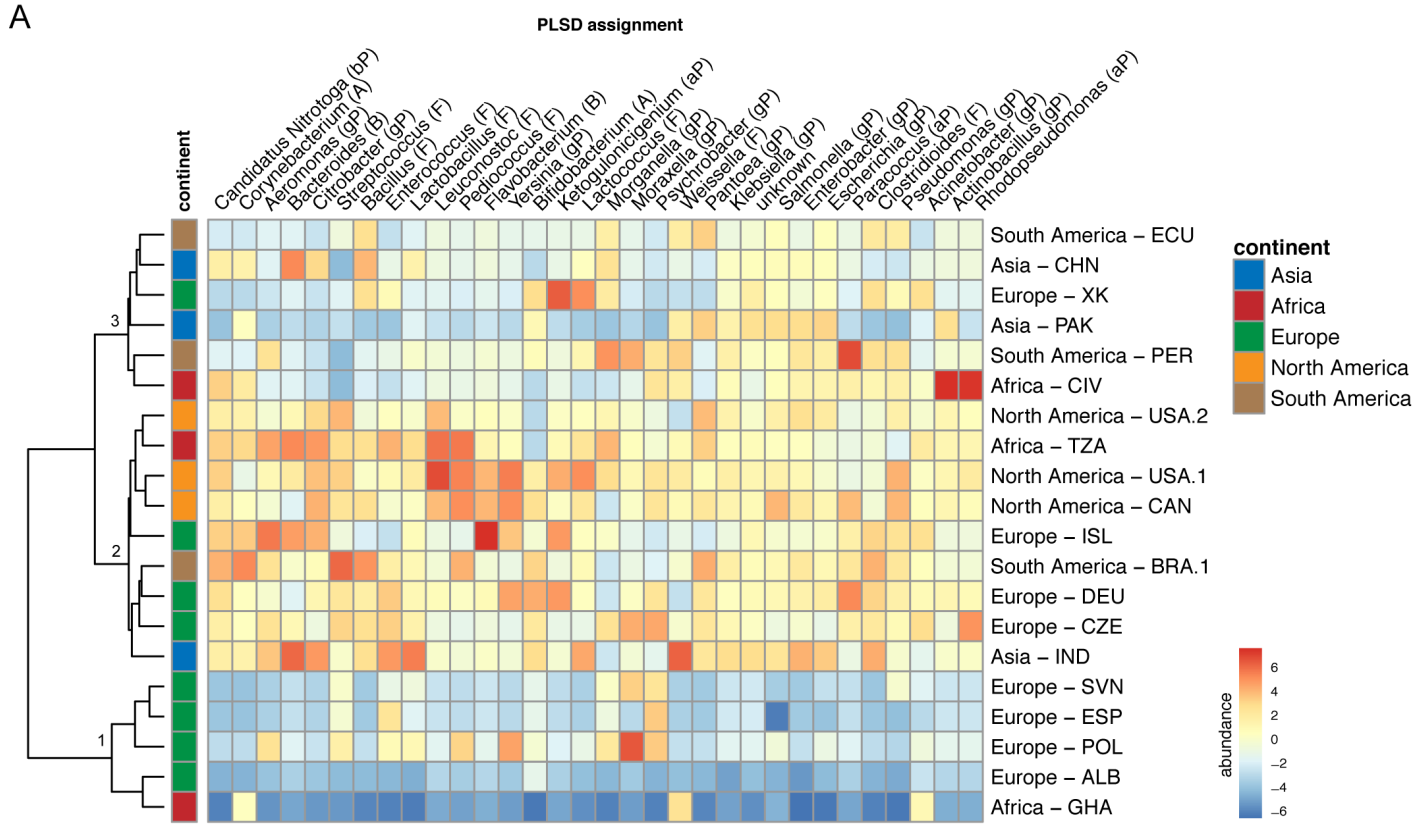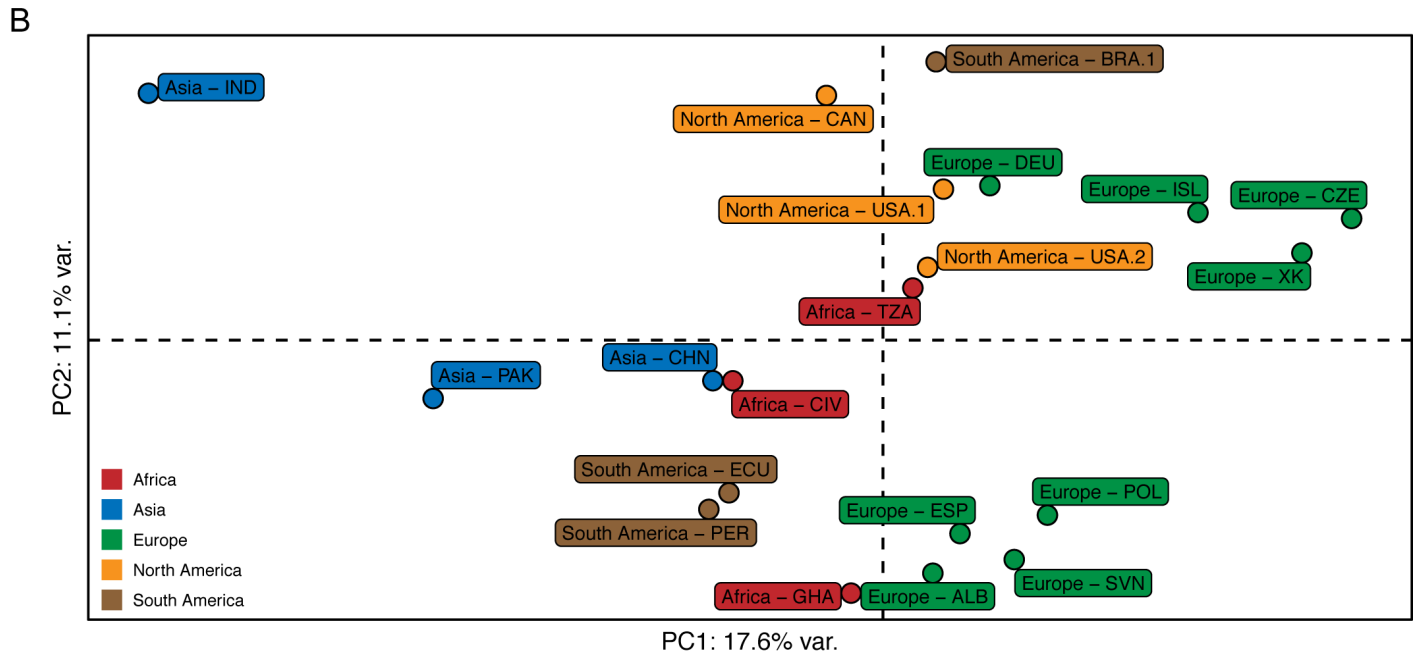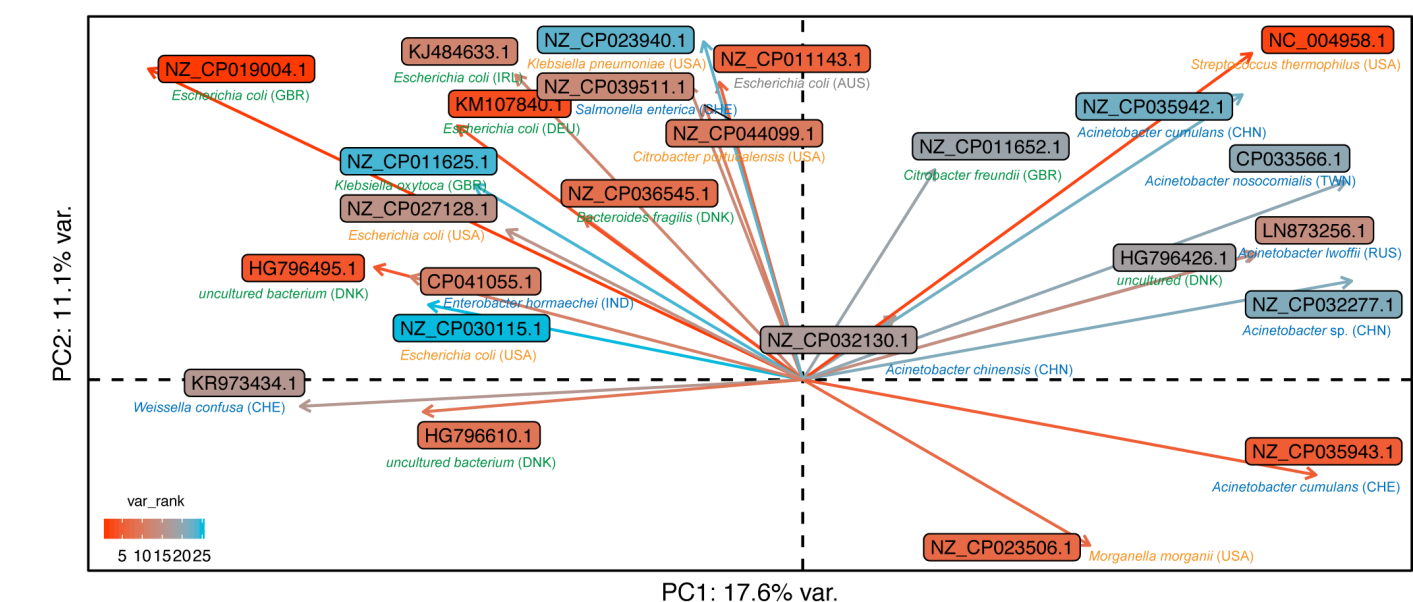

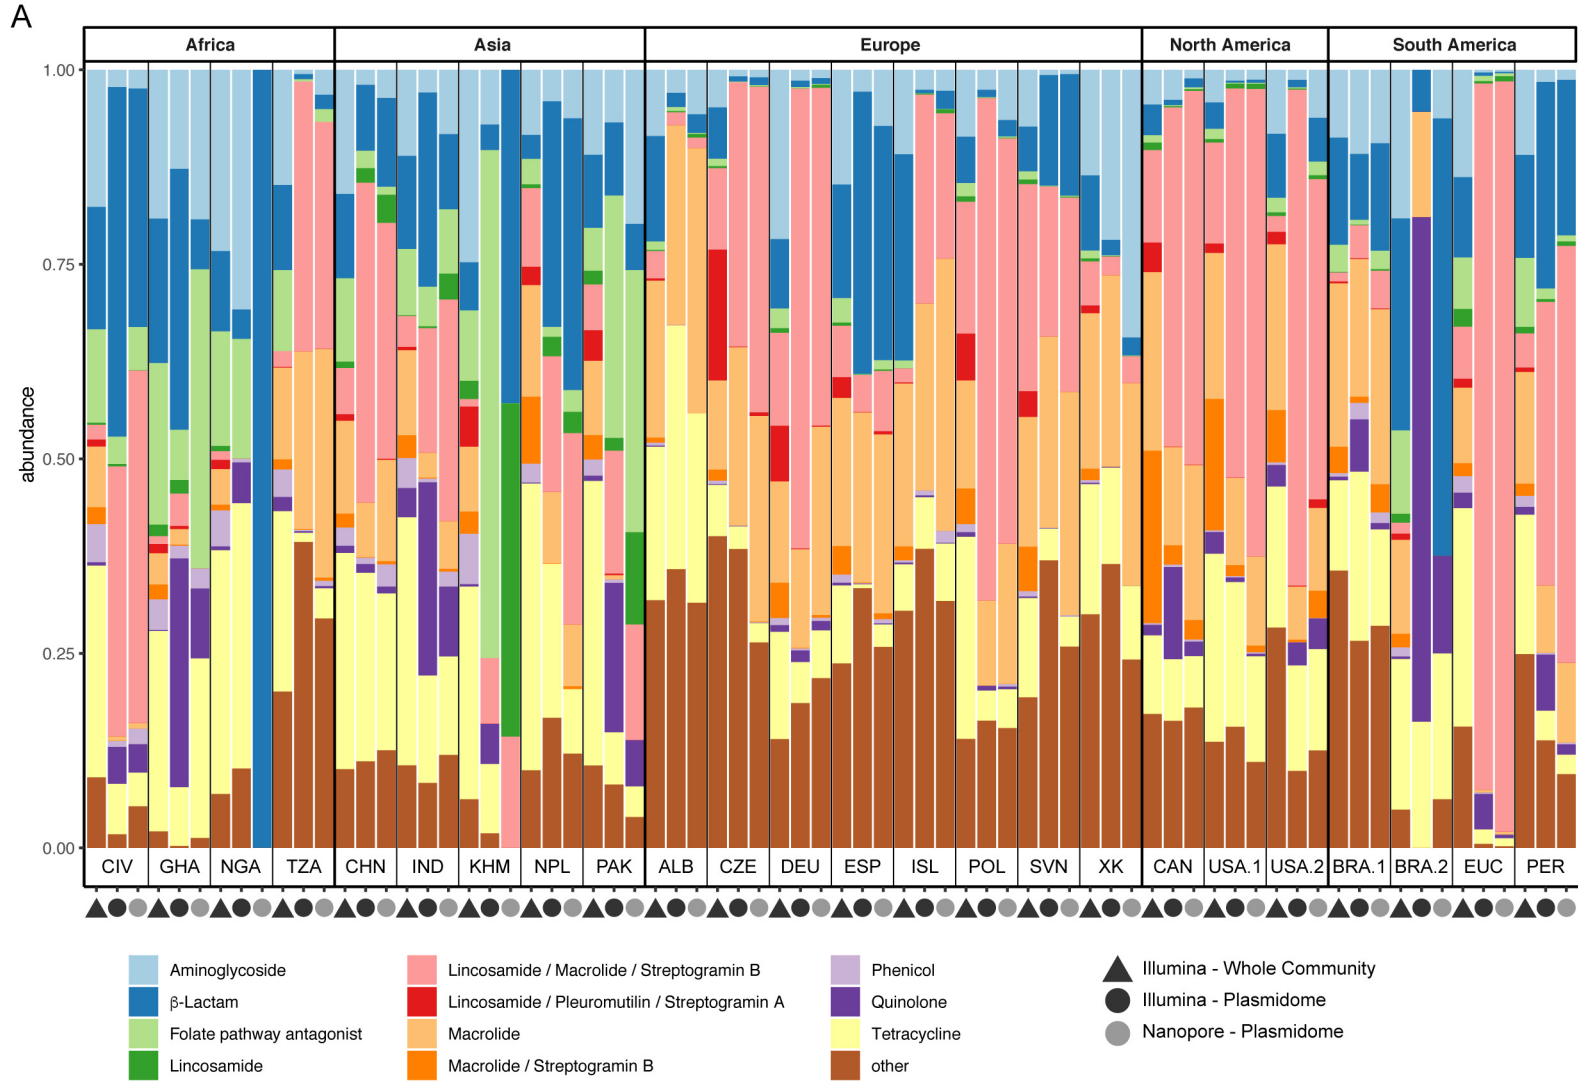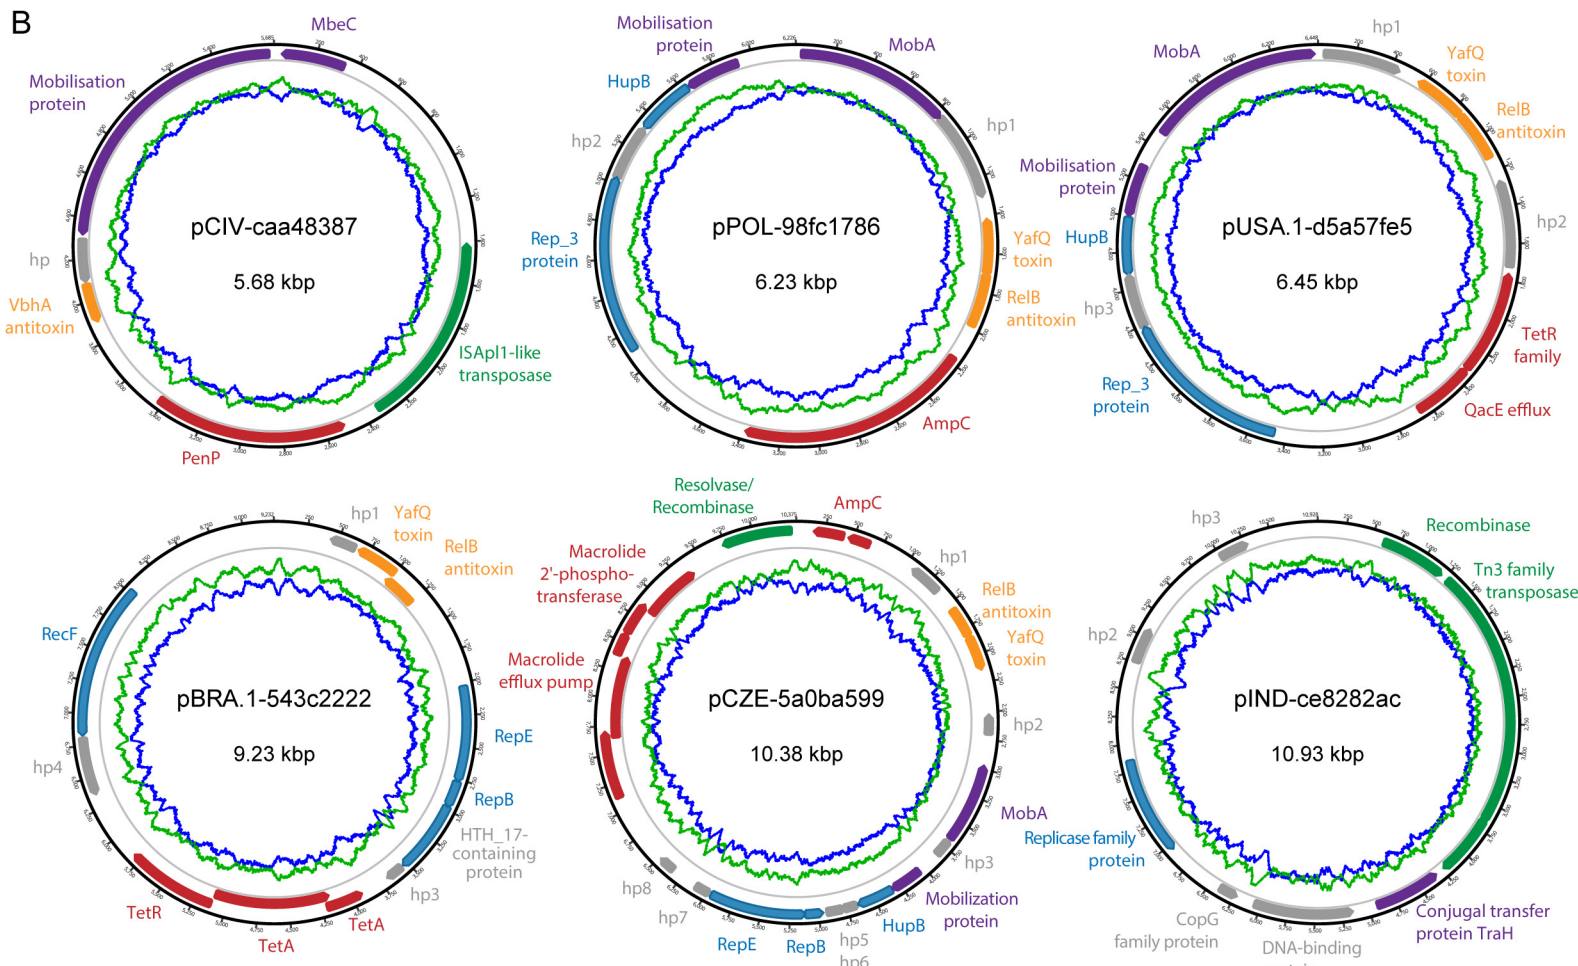

Source: https://www.biorxiv.org/content/10.1101/2021.03.08.434362v2.full.pdf
